# Supplementary material for: Morphological, cytological and metabolic consequences of autopolyploidization in Hylocereus (Cactaceae) species
Source: PubMed Central journal article supplement (PMC3831760; doi:10.1186/1471-2229-13-173), 2013-11-04
Supplement: 1471-2229-13-173-S2.pdf [file 1471-2229-13-173-S2.pdf]

**Additional file 2:** Relative content of primary metabolites obtained from fruit pulp GC-MS analysis and ( $\log_{10}$ ) fold change in the autopolyploid lines. Mass spectral searching utilized the algorithm incorporated in the Xcalibur® data system and finally normalized by the internal standard ribitol. MP = main product, BP = by product. Asterisks represent significant changes in metabolite content ( $P < 0.01$ ) according to ANOVA. Fold change represents the ( $\log_{10}$ ) change in the relative content of each metabolite between the autopolyploid lines and their respective control lines

|                       |                           | 2n      |          | 4n      |          | Significance | $(\log_{10})$ 4n fold change | 3n      |          | 6n      |          | Significance | $(\log_{10})$ 6n fold change |
|-----------------------|---------------------------|---------|----------|---------|----------|--------------|------------------------------|---------|----------|---------|----------|--------------|------------------------------|
|                       | Metabolites               | Average | $\pm$ SE | Average | $\pm$ SE |              |                              | Average | $\pm$ SE | Average | $\pm$ SE |              |                              |
| Sugars                | Glucose MP                | 3601.49 | 188.77   | 3575.94 | 383.46   | 0.00         | 27951.79                     | 1519.40 | 14429.41 | 3388.09 | *        | -0.29        |                              |
|                       | Fructose MP               | 1281.93 | 78.08    | 1180.14 | 166.83   | 0.00         | 22151.62                     | 1260.36 | 12547.01 | 2712.50 | *        | -0.25        |                              |
|                       | Fructose BP               | 776.89  | 47.46    | 719.29  | 99.92    | 0.00         | 14795.77                     | 884.84  | 8230.16  | 2006.52 | *        | -0.25        |                              |
|                       | <i>myo</i> -Inositol      | 621.10  | 37.09    | 582.53  | 61.82    | 0.00         | 19140.14                     | 975.76  | 18915.80 | 1580.29 |          | -0.01        |                              |
|                       | Glucose BP                | 492.65  | 26.65    | 453.92  | 53.56    | -0.01        | 6323.09                      | 444.76  | 2688.23  | 799.67  | *        | -0.37        |                              |
|                       | Glucopyranose             | 12.76   | 0.59     | 11.17   | 1.32     | -0.03        | 126.35                       | 7.47    | 60.48    | 14.57   | *        | -0.32        |                              |
|                       | Sucrose                   | 9.03    | 0.86     | 8.42    | 1.42     | 0.00         | 112.51                       | 16.08   | 83.07    | 8.84    |          | -0.13        |                              |
|                       | Arabinose MP              | 1.78    | 0.18     | 1.68    | 0.21     | 0.02         | 4.75                         | 0.55    | 2.86     | 0.67    |          | -0.22        |                              |
|                       | Arabinose BP              | 1.09    | 0.08     | 0.99    | 0.09     | -0.01        | 1.30                         | 0.20    | 1.01     | 0.28    |          | -0.11        |                              |
|                       | Galacturonate             | 0.99    | 0.06     | 0.93    | 0.08     | -0.01        | 1.85                         | 0.16    | 1.19     | 0.51    |          | -0.19        |                              |
|                       | Threonate                 | 0.86    | 0.08     | 0.70    | 0.05     | -0.07        | 6.94                         | 0.45    | 3.63     | 0.46    | *        | -0.28        |                              |
| Amino acids           | Alanine                   | 0.03    | 0.00     | 0.03    | 0.00     | 0.07         | 0.07                         | 0.02    | 0.13     | 0.06    |          | 0.26         |                              |
|                       | Proline                   | 3.39    | 0.59     | 3.14    | 0.71     | -0.01        | 128.40                       | 28.06   | 429.05   | 80.07   | *        | 0.52         |                              |
|                       | Pyroglutamate             | 1.28    | 0.09     | 1.24    | 0.15     | 0.01         | 21.96                        | 1.80    | 70.66    | 9.26    | *        | 0.51         |                              |
|                       | Aspartate                 | 0.38    | 0.03     | 0.34    | 0.05     | -0.02        | 3.95                         | 0.12    | 6.93     | 0.23    | *        | 0.24         |                              |
|                       | Valine                    | 0.12    | 0.02     | 0.16    | 0.03     | 0.16         | 0.98                         | 0.04    | 2.99     | 0.05    | *        | 0.48         |                              |
|                       | Tryptophan                | 1.37    | 0.05     | 1.31    | 0.03     | 0.02         | 1.40                         | 0.05    | 4.92     | 0.10    | *        | 0.55         |                              |
|                       | Tyrosine                  | 0.08    | 0.02     | 0.10    | 0.02     | 0.13         | 0.08                         | 0.00    | 0.11     | 0.00    | *        | 0.15         |                              |
|                       | Serine                    | 0.31    | 0.01     | 0.30    | 0.01     | 0.02         | 1.16                         | 0.19    | 1.90     | 0.25    |          | 0.21         |                              |
| TCA cycle             | Malate                    | 67.02   | 4.63     | 76.32   | 8.47     | 0.08         | 47.75                        | 3.68    | 272.67   | 43.84   | *        | 0.76         |                              |
|                       | Fumarate                  | 5.61    | 0.58     | 6.03    | 0.88     | 0.07         | 1.10                         | 0.13    | 2.50     | 0.43    | *        | 0.36         |                              |
|                       | Citrate                   | 3.39    | 0.32     | 4.40    | 0.66     | 0.15         | 706.47                       | 70.47   | 2733.99  | 384.40  | *        | 0.59         |                              |
|                       | <i>cis</i> -Aconitate     | 0.11    | 0.01     | 0.12    | 0.02     | 0.11         | 2.32                         | 0.14    | 7.00     | 0.89    | *        | 0.48         |                              |
|                       | Succinate                 | 0.21    | 0.01     | 0.19    | 0.01     | 0.00         | 0.08                         | 0.00    | 0.15     | 0.04    | *        | 0.30         |                              |
| Organic acids         | Maleic acid               | 25.01   | 1.26     | 26.30   | 2.20     | 0.05         | 44.66                        | 2.21    | 86.70    | 13.57   | *        | 0.29         |                              |
|                       | Phosphoric acid           | 9.81    | 1.31     | 9.23    | 1.48     | -0.01        | 88.44                        | 8.19    | 116.97   | 13.70   |          | 0.12         |                              |
|                       | Gluconic acid             | 1.05    | 0.08     | 1.07    | 0.11     | 0.04         | 1.32                         | 0.08    | 5.65     | 1.71    | *        | 0.63         |                              |
|                       | Itaconic acid             | 0.17    | 0.03     | 0.16    | 0.02     | -0.01        | 0.68                         | 0.06    | 1.38     | 0.14    | *        | 0.31         |                              |
|                       | Lactic acid               | 0.16    | 0.01     | 0.19    | 0.03     | 0.11         | 0.89                         | 0.07    | 1.74     | 0.25    | *        | 0.29         |                              |
|                       | Nicotinic acid            | 0.10    | 0.00     | 0.12    | 0.01     | 0.07         | 1.05                         | 0.04    | 1.41     | 0.13    | *        | 0.13         |                              |
|                       | Caffeic acid              | 0.01    | 0.00     | 0.01    | 0.00     | 0.06         | 0.38                         | 0.02    | 0.44     | 0.09    |          | 0.06         |                              |
| Saturated fatty acids | Nonanoic acid (C9:0)      | 0.29    | 0.03     | 0.25    | 0.03     | 0.02         | 1.03                         | 0.04    | 1.30     | 0.10    |          | 0.08         |                              |
|                       | Decanoic acid (C10:0)     | 0.04    | 0.00     | 0.03    | 0.00     | -0.03        | 0.21                         | 0.02    | 0.20     | 0.03    |          | 0.10         |                              |
|                       | Hexadecanoic acid (C16:0) | 0.50    | 0.02     | 0.50    | 0.03     | 0.04         | 2.92                         | 0.10    | 3.66     | 0.48    |          | 0.10         |                              |
|                       | Octadecanoic acid (C18:0) | 1.23    | 0.04     | 1.18    | 0.05     | -0.02        | 4.64                         | 0.23    | 5.56     | 0.48    |          | 0.00         |                              |
