# Supplementary material for: Morphological, cytological and metabolic consequences of autopolyploidization in Hylocereus (Cactaceae) species
Source: PubMed Central journal article supplement (PMC3831760; doi:10.1186/1471-2229-13-173), 2013-11-04
Supplement: 1471-2229-13-173-S3.pdf [file 1471-2229-13-173-S3.pdf]

**Additional file 3:** Relative content of primary metabolites obtained from seeds GC-MS analysis and ( $\log_{10}$ ) fold change in the autopolyploid lines. Mass spectral searching utilized the algorithm incorporated in the Xcalibur® data system and finally normalized by the internal standard ribitol. MP = main product, BP = by product. Asterisks represent significant changes in metabolite content ( $P < 0.01$ ) according to ANOVA. Fold change represents the ( $\log_{10}$ ) change in the relative content of each metabolite between the autopolyploid lines and their respective control lines

|                       |                            | 2n      |       | 4n      |       | Significance | (Log <sub>10</sub> ) 4n | 3n      |       | 6n      |       | Significance | (Log <sub>10</sub> ) 6n |
|-----------------------|----------------------------|---------|-------|---------|-------|--------------|-------------------------|---------|-------|---------|-------|--------------|-------------------------|
|                       | Metabolites                | Average | ±SE   | Average | ±SE   |              | fold change             | Average | ±SE   | Average | ±SE   |              | fold change             |
| Sugars                | Glucose MP                 | 374.20  | 16.86 | 168.09  | 11.59 | *            | -0.35                   | 351.89  | 17.78 | 262.48  | 8.24  | *            | -0.13                   |
|                       | Glucose BP                 | 28.14   | 1.41  | 11.76   | 0.74  | *            | -0.38                   | 26.96   | 1.48  | 19.88   | 0.79  | *            | -0.13                   |
|                       | Fructose MP                | 184.45  | 9.07  | 86.58   | 5.50  | *            | -0.33                   | 199.28  | 9.62  | 193.57  | 6.12  |              | -0.01                   |
|                       | Fructose BP                | 128.68  | 6.00  | 59.97   | 4.10  | *            | -0.33                   | 139.19  | 6.98  | 136.59  | 4.65  |              | -0.01                   |
|                       | <i>myo</i> -Inositol       | 191.45  | 15.39 | 133.08  | 8.22  | *            | -0.16                   | 503.91  | 13.86 | 525.84  | 10.39 | *            | 0.02                    |
|                       | Glucopyranose              | 0.22    | 0.01  | 0.12    | 0.02  | *            | -0.25                   | 0.13    | 0.01  | 0.09    | 0.00  | *            | -0.15                   |
|                       | Sucrose                    | 701.12  | 25.98 | 471.57  | 22.13 | *            | -0.17                   | 685.49  | 12.64 | 341.37  | 8.66  | *            | -0.30                   |
|                       | Isomaltose                 | 0.66    | 0.04  | 0.47    | 0.04  | *            | -0.14                   | 0.99    | 0.03  | 0.78    | 0.06  | *            | -0.10                   |
|                       | Raffinose                  | 277.80  | 15.12 | 234.87  | 16.23 |              | -0.07                   | 264.57  | 10.08 | 105.86  | 5.26  | *            | -0.40                   |
|                       | Ribose MP                  | 1.57    | 0.13  | 3.33    | 0.17  | *            | 0.33                    | 2.02    | 0.07  | 4.87    | 0.16  | *            | 0.38                    |
|                       | Ribose BP                  | 0.39    | 0.04  | 0.44    | 0.03  |              | 0.06                    | 0.37    | 0.01  | 0.60    | 0.02  | *            | 0.21                    |
|                       | Galacturonate              | 0.22    | 0.01  | 0.19    | 0.01  |              | -0.08                   | 0.18    | 0.01  | 0.22    | 0.03  |              | 0.07                    |
|                       | Threonate                  | 1.19    | 0.06  | 0.87    | 0.05  | *            | -0.14                   | 0.51    | 0.02  | 0.38    | 0.02  | *            | -0.12                   |
| Amino acids           | Pyroglutamate              | 3.92    | 0.69  | 7.06    | 1.68  |              | 0.26                    | 7.37    | 0.50  | 15.26   | 3.94  |              | 0.32                    |
|                       | Aspartate                  | 0.49    | 0.13  | 0.57    | 0.06  |              | 0.07                    | 2.62    | 0.12  | 1.79    | 0.14  | *            | -0.16                   |
|                       | Valine                     | 5.72    | 0.29  | 6.24    | 0.61  |              | 0.04                    | 8.72    | 0.20  | 6.27    | 0.37  | *            | -0.14                   |
| TCA cycle             | Malate                     | 9.95    | 0.78  | 9.53    | 0.95  |              | -0.02                   | 6.25    | 0.33  | 8.44    | 0.36  | *            | 0.13                    |
|                       | Fumarate                   | 1.48    | 0.44  | 1.27    | 0.36  |              | -0.07                   | 0.31    | 0.07  | 0.44    | 0.14  |              | 0.15                    |
|                       | Citrate                    | 6.37    | 1.45  | 7.18    | 1.89  |              | 0.05                    | 39.61   | 5.29  | 79.79   | 11.20 | *            | 0.30                    |
|                       | Succinate                  | 0.11    | 0.01  | 0.11    | 0.01  |              | 0.00                    | 0.05    | 0.00  | 0.04    | 0.00  |              | -0.07                   |
| Organic acids         | Maleic acid                | 0.13    | 0.03  | 0.12    | 0.03  |              | -0.04                   | 0.05    | 0.01  | 0.08    | 0.01  |              | 0.23                    |
|                       | Phosphoric acid            | 18.16   | 0.64  | 20.29   | 1.13  |              | 0.05                    | 17.67   | 0.66  | 24.59   | 1.76  |              | 0.14                    |
|                       | Gluconic acid              | 0.51    | 0.03  | 0.99    | 0.11  | *            | 0.29                    | 1.58    | 0.12  | 3.36    | 0.23  | *            | 0.33                    |
|                       | Itaconic acid              | 0.08    | 0.01  | 0.14    | 0.02  |              | 0.24                    | 0.19    | 0.09  | 0.49    | 0.20  |              | 0.40                    |
|                       | Pyruvic acid               | 0.69    | 0.07  | 0.84    | 0.08  |              | 0.08                    | 0.89    | 0.02  | 0.85    | 0.03  |              | -0.02                   |
|                       | Nicotinic acid             | 2.51    | 0.13  | 2.26    | 0.19  |              | -0.04                   | 1.87    | 0.06  | 1.78    | 0.09  |              | -0.02                   |
|                       | Caffeic acid               | 0.03    | 0.00  | 0.04    | 0.01  |              | 0.06                    | 0.04    | 0.00  | 0.05    | 0.00  |              | 0.01                    |
| Saturated fatty acids | Nonanoic acid (C9:0)       | 0.55    | 0.04  | 0.78    | 0.11  |              | 0.15                    | 0.48    | 0.04  | 0.43    | 0.05  |              | -0.05                   |
|                       | Decanoic acid (C10:0)      | 0.18    | 0.04  | 0.16    | 0.02  |              | -0.05                   | 0.14    | 0.02  | 0.10    | 0.01  |              | -0.17                   |
|                       | Dodecanoic acid (C12:0)    | 0.22    | 0.01  | 0.22    | 0.01  |              | 0.00                    | 0.24    | 0.01  | 0.23    | 0.01  |              | -0.01                   |
|                       | Tetradecanoic acid (C14:0) | 0.38    | 0.02  | 0.39    | 0.03  |              | 0.02                    | 0.34    | 0.02  | 0.32    | 0.01  |              | -0.02                   |
|                       | Hexadecanoic acid (C16:0)  | 9.95    | 0.54  | 9.68    | 0.66  |              | -0.01                   | 8.48    | 0.25  | 7.87    | 0.20  |              | -0.03                   |
|                       | Octadecanoic acid (C18:0)  | 3.25    | 0.15  | 3.31    | 0.25  |              | 0.01                    | 2.99    | 0.09  | 2.89    | 0.09  |              | -0.01                   |
|                       | Arachidic acid (C20:0)     | 0.17    | 0.02  | 0.15    | 0.01  |              | -0.05                   | 0.16    | 0.01  | 0.16    | 0.01  |              | 0.01                    |
