# Supplementary material for: Morphological, cytological and metabolic consequences of autopolyploidization in Hylocereus (Cactaceae) species
Source: PubMed Central journal article supplement (PMC3831760; doi:10.1186/1471-2229-13-173), 2013-11-04
Supplement: 1471-2229-13-173-S7.pdf [file 1471-2229-13-173-S7.pdf]

**Additional file 7:** Relative content of secondary metabolites obtained from seeds UPLC-QTOF-MS/MS analysis and ( $\log_{10}$ ) fold change in the autopolyploid lines. Mass spectral searching utilized the algorithm incorporated in the MassLynx® data system and finally normalized by the internal standard ampicillin. Asterisks represent significant changes in metabolite content ( $P < 0.01$ ) according to ANOVA. Fold change represents the ( $\log_{10}$ ) change in the relative content of each metabolite between the autopolyploid lines and their respective control lines. The values in parentheses represent the  $m/z$  for each metabolite. NA = non-annotated

|               | Metabolites                            | 2n      |          | 4n      |          | Significance | $(\log_{10})$ 4n fold change | 3n      |          | 6n      |          | Significance | $(\log_{10})$ 6n fold change |
|---------------|----------------------------------------|---------|----------|---------|----------|--------------|------------------------------|---------|----------|---------|----------|--------------|------------------------------|
|               |                                        | Average | $\pm$ SE | Average | $\pm$ SE |              |                              | Average | $\pm$ SE | Average | $\pm$ SE |              |                              |
| Benzoic acids | Benzoic acid (123.0429)                | 10.04   | 0.36     | 9.99    | 0.38     |              | 0.00                         | 16.86   | 0.31     | 22.42   | 0.50     | *            | 0.12                         |
|               | <i>p</i> -Hydrobenzoic acid (139.0386) | 3.95    | 0.10     | 6.98    | 0.11     | *            | 0.25                         | 3.79    | 0.19     | 6.54    | 0.32     | *            | 0.24                         |
|               | Protocatechuic acid (153.0197)         | 6.06    | 0.12     | 19.51   | 0.35     | *            | 0.51                         | 3.66    | 0.56     | 4.22    | 0.34     |              | 0.06                         |
| Flavonoids    | Hesperetin (303.0874)                  | 2.79    | 0.07     | 3.84    | 0.10     | *            | 0.17                         | 2.87    | 0.15     | 5.61    | 0.17     | *            | 0.29                         |
|               | Quercetin (303.0508)                   | 1.60    | 0.07     | 2.35    | 0.24     | *            | 0.14                         | 0.55    | 0.04     | 1.14    | 0.06     | *            | 0.32                         |
|               | Rutin (611.1613)                       | 4.91    | 0.16     | 6.04    | 0.39     | *            | 0.09                         | 2.43    | 0.08     | 4.58    | 0.25     | *            | 0.27                         |
| NA            | NA (151.0308)                          | 77.23   | 3.70     | 80.55   | 3.12     | *            | 0.02                         | 60.23   | 1.34     | 71.74   | 2.59     | *            | 0.08                         |
|               | NA (160.0657)                          | 242.99  | 7.77     | 208.82  | 2.74     | *            | -0.07                        | 234.63  | 7.20     | 124.94  | 5.34     | *            | -0.27                        |
|               | NA (188.0699)                          | 450.09  | 9.96     | 342.91  | 6.68     | *            | -0.12                        | 425.59  | 12.86    | 229.31  | 7.37     | *            | -0.27                        |
|               | NA (285.0811)                          | 151.10  | 5.44     | 194.66  | 2.79     | *            | 0.11                         | 55.67   | 0.85     | 26.32   | 1.35     | *            | -0.33                        |
|               | NA (329.9262)                          | 359.64  | 9.55     | 377.38  | 9.45     |              | 0.02                         | 338.31  | 11.69    | 366.91  | 4.55     |              | 0.04                         |
|               | NA (365.1045)                          | 80.32   | 1.48     | 73.15   | 1.50     | *            | -0.04                        | 60.35   | 1.77     | 41.71   | 1.14     | *            | -0.16                        |
